# Supplementary material for: Effects of Isoflavone-Rich NADES Extract of Pueraria lobata Roots and Astaxanthin-Rich Phaffia rhodozyma Extract on Prostate Carcinogenesis in Rats
Source: MDPI journal article supplement (doi:10.3390/plants12030564), 2023-01-26
Supplement: s1 [file s1]

Table S1. Blood count parameters

| Group                | WBC<br>10 <sup>9</sup> /L | Lymph#<br>10 <sup>9</sup> /L | Mon#<br>10 <sup>9</sup> /L | Gran#<br>10 <sup>9</sup> /L | RBC<br>10 <sup>12</sup> /L | HGB<br>g/L | HCT<br>%   | PLT<br>10 <sup>9</sup> /L |
|----------------------|---------------------------|------------------------------|----------------------------|-----------------------------|----------------------------|------------|------------|---------------------------|
| IC                   | 12.2 ± 0.9                | 7 ± 0.5                      | 0.44 ± 0.04                | 3.5 ± 0.3                   | 9.1 ± 0.1                  | 163 ± 2    | 47.1 ± 0.5 | 791 ± 42                  |
| PCa                  | 13.4 ± 0.5                | 7 ± 0.4                      | 0.53 ± 0.02                | 5.8 ± 0.4 <sup>a</sup>      | 9.4 ± 0.1                  | 167 ± 1    | 48.6 ± 0.3 | 615 ± 42 <sup>a</sup>     |
| PCa +<br>isoflavones | 13.1 ± 0.6                | 6.7 ± 0.3                    | 0.46 ± 0.03                | 5.6 ± 0.5 <sup>a</sup>      | 9.3 ± 0.1                  | 169 ± 2    | 48.9 ± 0.8 | 810 ± 48 <sup>b</sup>     |
| PCa +<br>astaxanthin | 13.1 ± 0.7                | 6.4 ± 0.2                    | 0.58 ± 0.04                | 5.1 ± 0.4 <sup>a</sup>      | 9 ± 0.2                    | 160 ± 4    | 47.1 ± 1   | 783 ± 69 <sup>b</sup>     |

<sup>a</sup> – p < 0.05, compared to IC group; <sup>b</sup> – p < 0.05, compared to PCa group

Table S2. Blood biochemistry parameters

| Group                | Total Protein,<br>g/l | Albumin,<br>g/l | Globulin,<br>g/l | Albumin/<br>Globulin<br>ratio | LDH,<br>U/l | Amylase,<br>U/l | Alkaline<br>Phosphatase,<br>U/l | AST,<br>U/l | ALT,<br>U/l | Ast/Alt<br>ratio |
|----------------------|-----------------------|-----------------|------------------|-------------------------------|-------------|-----------------|---------------------------------|-------------|-------------|------------------|
| IC                   | 66.6 ± 1.5            | 29.5 ± 0.9      | 37.1 ± 1.1       | 0.80 ± 0.04                   | 1703 ± 197  | 1693 ± 161      | 133 ± 16                        | 150 ± 13    | 80.6 ± 4.8  | 1.86 ± 0.13      |
| PCa                  | 62.2 ± 1.8            | 29.1 ± 1.1      | 33.1 ± 1.5       | 0.91 ± 0.06                   | 2045 ± 161  | 1675 ± 97       | 152 ± 24                        | 164 ± 17    | 87 ± 6.2    | 1.89 ± 0.12      |
| PCa +<br>isoflavones | 65.9 ± 2.5            | 32.0 ± 1.0      | 33.9 ± 2.2       | 0.99 ± 0.07                   | 2113 ± 305  | 1489 ± 114      | 135 ± 26                        | 137 ± 4     | 76.1 ± 3.7  | 1.82 ± 0.06      |
| PCa +<br>astaxanthin | 66.8 ± 2.5            | 31.7 ± 1.3      | 35.1 ± 1.5       | 0.91 ± 0.04                   | 1562 ± 131  | 1702 ± 86       | 188 ± 22                        | 141 ± 10    | 77.8 ± 7.4  | 1.85 ± 0.15      |

Table S2, Continuation

| Group                | Glucose,<br>mmol/l | Triglycerides,<br>mmol/l | Total bilirubin,<br>μmol/l | Direct bilirubin,<br>μmol/l | Creatinine,<br>μmol/l | Urea,<br>mmol/l | Magnesium,<br>mmol/l | Iron,<br>μmol/l |
|----------------------|--------------------|--------------------------|----------------------------|-----------------------------|-----------------------|-----------------|----------------------|-----------------|
| IC                   | 4.36 ± 0.22        | 1.43 ± 0.36              | 1.72 ± 0.31                | 0.25 ± 0.04                 | 53.1 ± 2.2            | 4.95 ± 0.3      | 0.73 ± 0.02          | 23.1 ± 1.6      |
| PCa                  | 4.5 ± 0.21         | 1.38 ± 0.29              | 1.75 ± 0.31                | 0.27 ± 0.08                 | 47.2 ± 4.1            | 5.1 ± 0.32      | 0.78 ± 0.01          | 26.6 ± 1.8      |
| PCa +<br>isoflavones | 4.75 ± 0.17        | 1.14 ± 0.12              | 2.22 ± 0.36                | 0.38 ± 0.07                 | 47 ± 1.6              | 5.24 ± 0.19     | 0.78 ± 0.03          | 29.4 ± 2.3      |
| PCa +<br>astaxanthin | 5.05 ± 0.28        | 1.55 ± 0.34              | 2.2 ± 0.3                  | 0.19 ± 0.1                  | 51.7 ± 2.7            | 5.46 ± 0.24     | 0.75 ± 0.03          | 28.1 ± 2.7      |

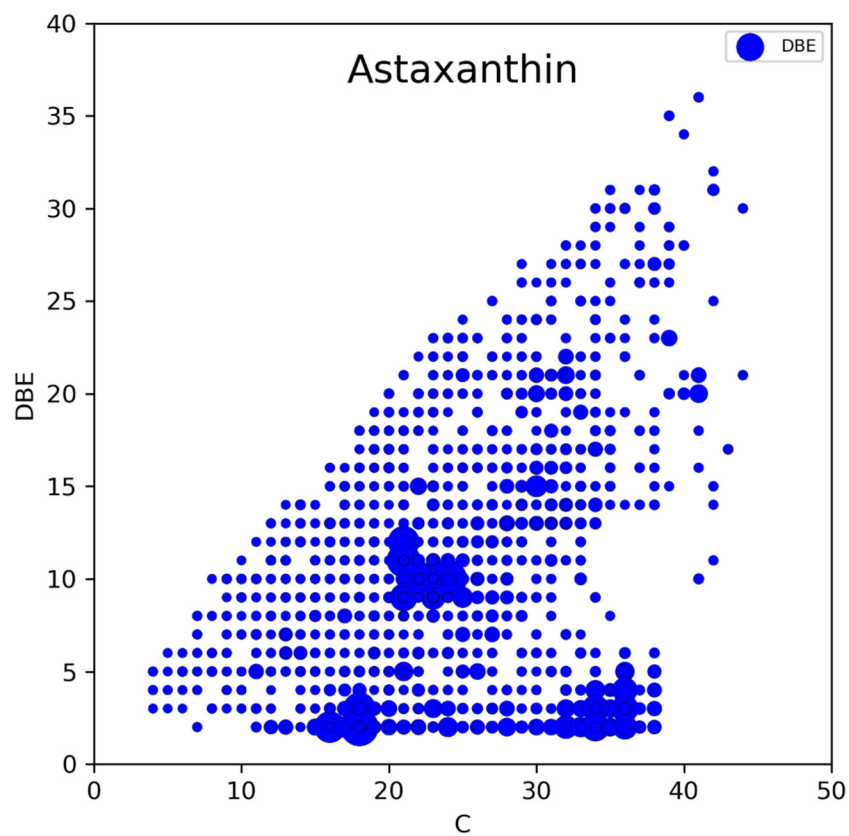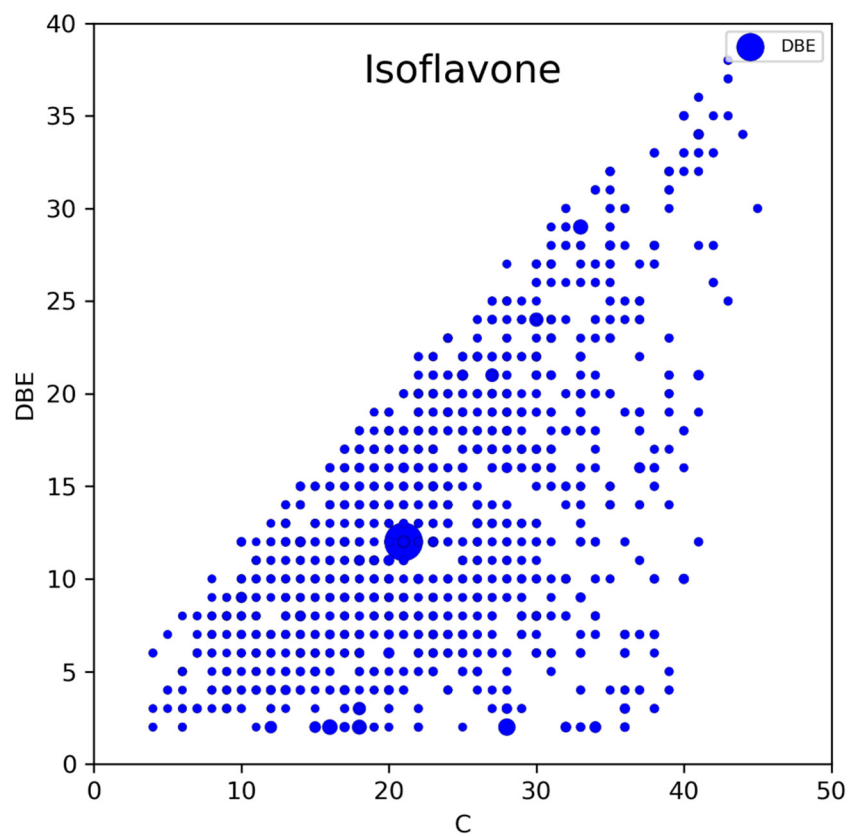

**Figure S1.** DBE vs C scatter plot representing the distribution of molecular components with different unsaturation. Size of dots correspond to relative intensity

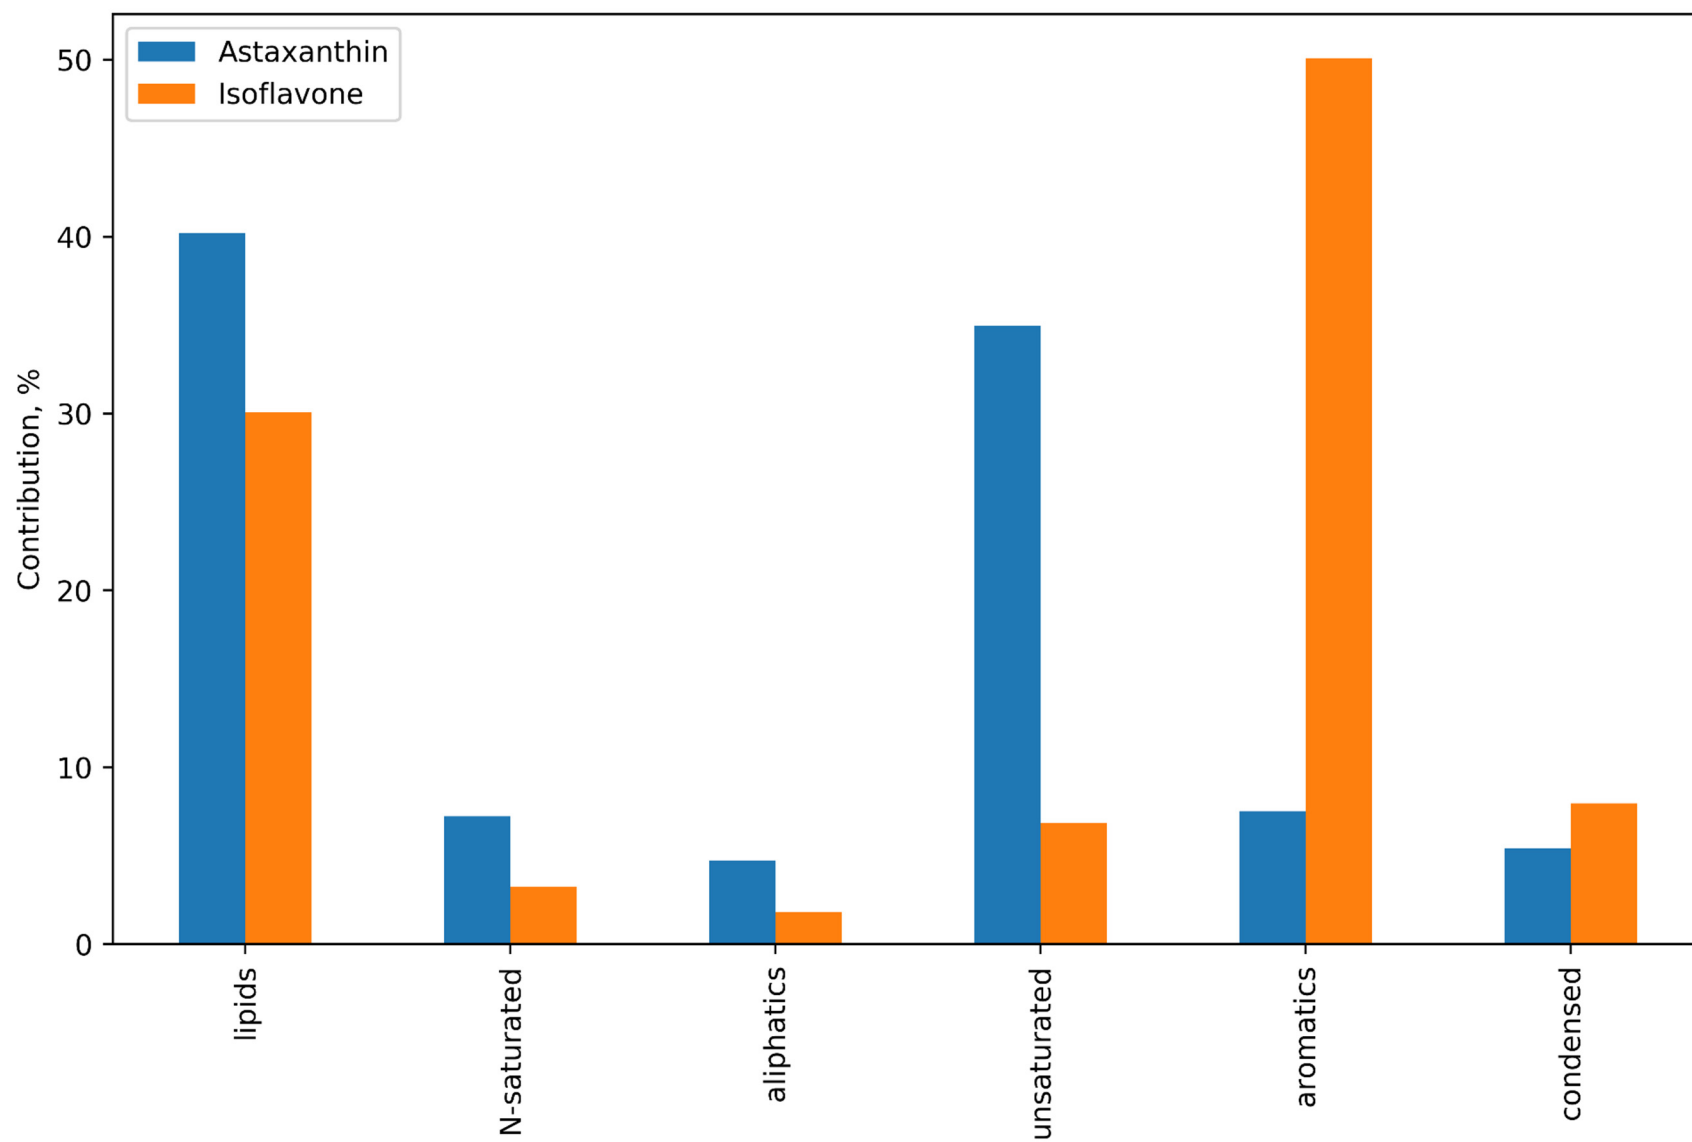

**Figure S2.** Contribution of  $AI_{con}$ -based chemical classes to molecular composition of samples
